# Supplementary material
Source: PubMed Central journal article supplement (PMC3648167)
Supplement: JVI.03247-12_zjv999097620so1.pdf [file JVI.03247-12_zjv999097620so1.pdf]

Supplement Figure 1

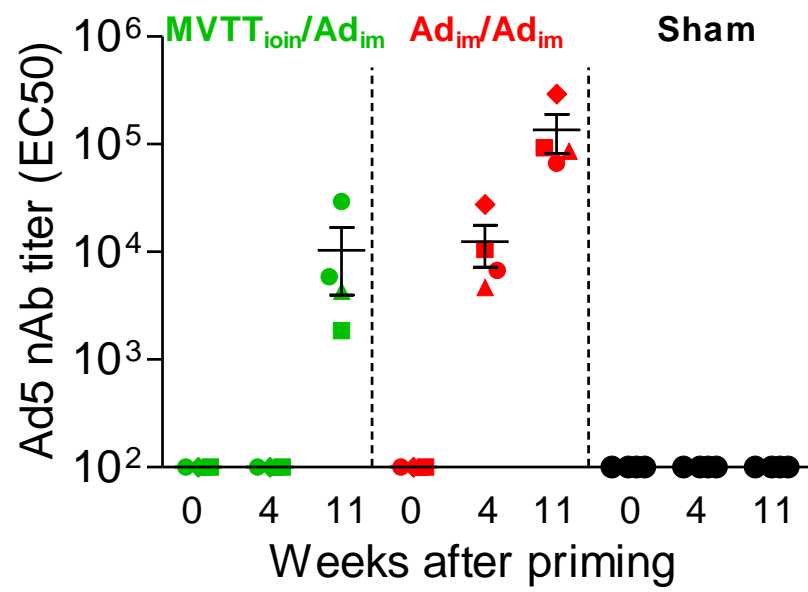

**Supplement Figure 1** Temporal analysis of neutralizing antibody against Ad5 vector during vaccination in the three groups of animals in Study I.
